# Supplementary material for: AKT inhibition impairs PCNA ubiquitylation and triggers synthetic lethality in homologous recombination-deficient cells submitted to replication stress
Source: PubMed Central journal article supplement (PMC6756059; doi:10.1038/s41388-019-0724-7), 2019-01-31

# Supplementary Figure 3

**A**

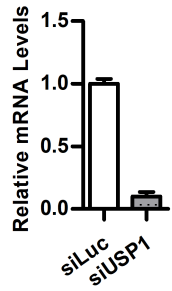

**B**

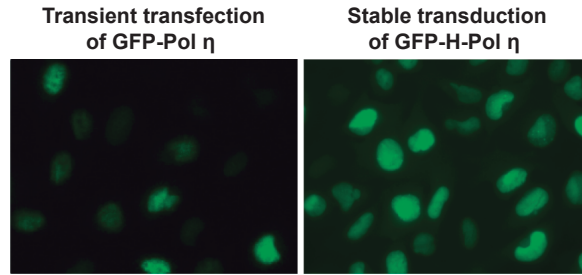

**C**

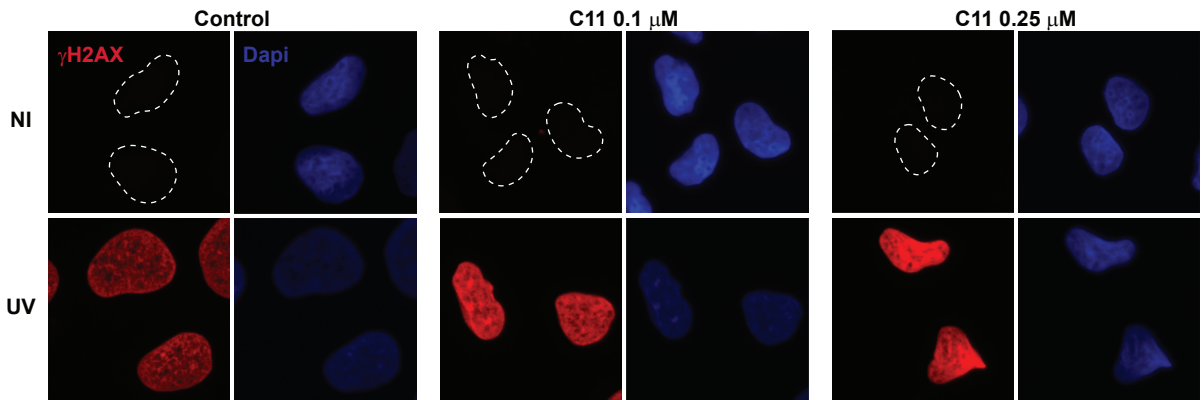

Supplement: 41388_2019_724_MOESM4_ESM.pdf [file 41388_2019_724_MOESM4_ESM.pdf]
