# Supplementary material for: AKT inhibition impairs PCNA ubiquitylation and triggers synthetic lethality in homologous recombination-deficient cells submitted to replication stress
Source: PubMed Central journal article supplement (PMC6756059; doi:10.1038/s41388-019-0724-7), 2019-01-31
Supplement: 41388_2019_724_MOESM7_ESM.pdf [file 41388_2019_724_MOESM7_ESM.pdf]

1 **AKT inhibition impairs PCNA ubiquitylation and triggers synthetic lethality in**  
2 **homologous-recombination-deficient cells submitted to replication stress**

3

4 **Florencia Villafañez<sup>1,2\*</sup>, Iris Alejandra García<sup>1,2\*</sup>, Sofia Carbajosa<sup>1,2</sup>, María Florencia**  
5 **Pansa<sup>1,2</sup>, Sabrina Mansilla<sup>3</sup>, María Candelaria Llorens<sup>1,2</sup>, Virginia Angiolini<sup>1,2</sup>, Laura**  
6 **Quantay<sup>1,2</sup>, Heinz Jacobs<sup>4</sup>, Kevin P Madauss<sup>5</sup>, Israel Gloger<sup>6</sup>, Vanesa Gottifredi<sup>3</sup>, Jose Luis**  
7 **Bocco<sup>1,2</sup> and Gaston Soria<sup>1,2</sup>.**

8

9 **\*: These authors contributed equally to this work**

10

11

12 1) Centro de Investigaciones en Bioquímica Clínica e Inmunología, CIBICI-CONICET.

13 2) Departamento de Bioquímica Clínica. Facultad de Ciencias Químicas, Universidad Nacional de  
14 Córdoba. Córdoba, Argentina.

15 3) Fundación Instituto Leloir. Buenos Aires, Argentina.

16 **4) Tumor Biology & Immunology-Netherlands Cancer Institute. Amsterdam, The Netherlands.**

17 5) GlaxoSmithKline - Trust in Science, Global Health R&D Upper Providence, PA, United States.

18 6) GlaxoSmithKline - Trust in Science, Global Health R&D. Stevenage, United Kingdom.

19 Correspondence should be addressed to Gaston Soria: [gsoria29@gmail.com](mailto:gsoria29@gmail.com) ; [gsoria@fcq.unc.edu.ar](mailto:gsoria@fcq.unc.edu.ar)

20

21

22 **Running title: ubi-PCNA inhibition is synthetic lethal with HR deficiency**

23

24

25

26 **Abstract**

27 Translesion DNA Synthesis (TLS) and homologous recombination (HR) cooperate during S-  
28 phase to **safeguard replication forks integrity**. Thus, the inhibition of TLS becomes a  
29 promising point **of** therapeutic intervention **in** HR-deficient cancers, where TLS impairment  
30 might trigger synthetic lethality (SL). The main limitation to test this hypothesis is the  
31 current lack of selective pharmacological inhibitors of TLS. Herein, we developed a  
32 miniaturized screening assay to identify inhibitors of PCNA ubiquitylation, a key post-  
33 translational modification required for efficient TLS activation. After screening a library of  
34 627 kinase inhibitors, we found that targeting the pro-survival kinase AKT leads to strong  
35 impairment of PCNA ubiquitylation. **Mechanistically, we found that AKT-mediated**  
36 **modulation of PCNA ubiquitylation after UV requires the upstream activity DNA-PKcs,**  
37 **without affecting PCNA-ubiquitylation levels in unperturbed cells**. Moreover, we confirmed  
38 that persistent AKT inhibition blocks the recruitment of TLS polymerases to sites of DNA  
39 damage and impairs DNA replication forks processivity after UV irradiation, leading to  
40 increased DNA replication stress and cell death. Remarkably, when we compared the  
41 differential survival of HR-proficient vs HR-deficient cells, we found that the combination of  
42 UV irradiation and AKT inhibition leads to robust SL-induction in HR-deficient cells. We link  
43 this phenotype to AKT ability to inhibit PCNA ubiquitylation, since the targeted knockdown  
44 of PCNA E3-ligase (RAD18) **and a non-ubiquitylable (PCNA K164R) knock-in model**  
45 **recapitulate** the observed SL-induction. Collectively, this work identifies AKT as a novel  
46 regulator of PCNA ubiquitylation and provides the proof-of-concept of inhibiting TLS as a  
47 therapeutic approach to selectively kill HR-deficient cells submitted to replication stress.

## 48 **Introduction**

49 The mono-ubiquitylation of PCNA (ubi-PCNA) steeply increases after treatment with DNA  
50 damaging agents that induce DNA replication fork stalling, like hydroxyurea, methyl  
51 methanesulfonate, cisplatin, aphidicolin and UV irradiation <sup>1-5</sup>. Ubi-PCNA, along with the  
52 specialized ubiquitin-binding domains present in the Y-family of polymerases <sup>6</sup>, are key  
53 players in translesion DNA synthesis (TLS) across damaged DNA templates <sup>7</sup>. Several  
54 regulatory factors of ubi-PCNA and TLS have been identified and characterized, like p21,  
55 REV1, USP1 and Spartan <sup>8-10</sup>. However, there is a lack of selective pharmacological inhibitors  
56 of TLS that could be used to explore the therapeutic potential of TLS inhibition. While some  
57 efforts have been made to identify selective inhibitors of TLS polymerases <sup>11</sup>, there are no  
58 universal TLS inhibitors available. Our previous work with the PCNA-interacting domain of  
59 p21 shows that this region blocks PCNA interaction with all the TLS polymerases tested,  
60 including Pol eta, Pol iota, Pol kappa and REV1, triggering replication forks stalling and  
61 genome instability <sup>12</sup>. Thus, the global and upstream interference of TLS may have a more  
62 robust biological effect than the individual targeting of each TLS polymerase. A central  
63 hypothesis of this work is that a way to selectively impair TLS, without impacting on critical  
64 housekeeping functions of PCNA would be to inhibit PCNA ubiquitylation. Hence, we  
65 designed a screening focused on the modulation of PCNA ubiquitylation. We evaluated a  
66 library of kinase inhibitors and identified AKT as a regulator of PCNA ubiquitylation.

67 AKT is an iconic pro-survival kinase that controls essential cellular functions such as growth,  
68 proliferation, apoptosis and metabolism <sup>13</sup>. In fact, even before the vast repertoire of AKT  
69 targets were identified, multiple groups independently demonstrated the central

70 involvement of AKT in promoting cell survival <sup>14</sup>. AKT has a well-established anti-apoptotic  
71 function, operating both directly, through the phosphorylation of relevant targets such as  
72 BAD and caspases, and indirectly, through the transcriptional modulation of pro-survival or  
73 pro-apoptotic genes such as IKK/NF- $\kappa$ B and MDM2/p53 <sup>15</sup>. Herein, we describe a new role  
74 for AKT in the regulation of PCNA ubiquitylation and TLS. We also show that AKT inhibitors  
75 can be used to achieve selective killing of HR-deficient cells in a manner that depends on  
76 their ability to inhibit PCNA ubiquitylation.

## 77 **Results**

### 78 **1- Development of a miniaturized western blot-based screening method to identify** 79 **PCNA ubiquitylation inhibitors.**

80 The mono ubiquitylated form of PCNA (ubi-PCNA) can be detected by classical western blot  
81 using antibodies against total PCNA. However, since the proportion of ubi-PCNA to total-  
82 PCNA is low, the detection of ubi-PCNA requires the loading of high protein concentrations,  
83 which implies working with samples from 24 MW formats or larger (supp Fig 1A). Moreover,  
84 in conditions where the amounts of ubi-PCNA are remarkably lower (i.e. **unperturbed** or  
85 inhibited conditions), the detection of ubi-PCNA requires even larger samples and long  
86 exposure times with classical chemiluminescence methods. While such types of  
87 experiments are suitable for **fundamental** research of PCNA biology, they do not provide  
88 either the sensitivity range nor the throughput capacity required for screening purposes. In  
89 this work, we developed a detection method of ubi-PCNA using two monoclonal PCNA  
90 antibodies. We used a novel antibody that detects ubi-PCNA in combination with an  
91 antibody that detects total-PCNA (Fig 1A and Supp. Fig 1B). For the detection and  
92 quantification of each PCNA form we employ LI-COR technology (Odyssey CLX), which  
93 provides a wide sensitivity range for quantification with very low background. This setup  
94 allowed us to perform western blots with samples obtained from a single 96 well, making it  
95 possible to detect up to a 5-fold induction of ubi-PCNA levels after 12 h of UV irradiation  
96 (Fig 1A). The calibration of the method was performed using non-specific PCNA  
97 ubiquitylation inhibitors, such as Epoxomicin and MG132 (Fig 1A). These drugs inhibit the  
98 proteasome, thus causing accumulation of ubiquitylated proteins and depleting the free

99 ubiquitin required for normal ubiquitylation reactions<sup>16</sup>. The use of a U2OS stable cell line  
100 expressing iRFP and the automatic capture of brightfield images were utilized as quality  
101 controls to monitor cell number, intra-well distribution, edge effects and general  
102 cytotoxicity (Figure 1B), allowing to screen 80 compounds per 96 MW plate (Figure 1C).

## 103 **2- Screening with a library of kinase inhibitors**

104 With the goal of identifying novel druggable targets to inhibit PCNA ubiquitylation we  
105 performed a screening using a library of 627 ATP-competitive kinase inhibitors provided by  
106 GlaxoSmithKline (**PKIS2: The Public Kinase Inhibitor Set 2**). As shown in Figure 1B, the  
107 screening was carried out combining each inhibitor at 1  $\mu$ M with 15J/m<sup>2</sup> of UV irradiation.  
108 The cut-off to define a hit was a decrease in the ratio of ubi-PCNA/total-PCNA greater than  
109 3 standard deviations of the average of the 8 UV control samples from each screening plate.  
110 22 hits were identified using this cut-off (Fig 1D). The analysis of databases such as PubChem  
111 and ChEMBL, as well as recent publications using the PKIS library allowed us to determine  
112 the putative target/s for the top list of hits (Supp table 1).

113 Among the 22 hits, two related AKT inhibitors (GSK1581428A and GSK1389063A) were  
114 identified. For simplicity, we called these compounds C11 and G8 respectively, due to their  
115 position on the screening plates (Supp Fig 2A). Early validation experiments confirmed that  
116 these compounds were strong inhibitors of PCNA ubiquitylation, leading to ubi-PCNA levels  
117 in UV-irradiated cells that were close to the non-irradiated samples (Fig 2A and Supp Fig  
118 2B). The analysis of phospho- and total-AKT confirmed that C11 and G8 were in fact ATP-  
119 competitive inhibitors of AKT, promoting both the accumulation of inactive pAKT and the  
120 degradation of total AKT (Fig 2B), as it was previously reported for other ATP-competitive

121 AKT inhibitors<sup>17,18</sup>. In the following experiments, the analysis was focused on C11 due to its  
122 remarkable activity and dose response behavior (supp Fig 2B). To rule out potential off-  
123 target effects and to **assess** whether the impairment of PCNA ubiquitylation was indeed a  
124 consequence of AKT inhibition, we also evaluated three commercially available AKT  
125 inhibitors with different chemical backbones: MK-2206, AZD5363 and GSK690693 (Supp Fig  
126 2C). In all cases, AKT inhibitors significantly impaired PCNA ubiquitylation (Fig 2C). We also  
127 confirmed that AKT activity was substantially impaired, since the downstream targets  
128 pGSK3b and pPRAS40 abruptly decreased after the treatment with these compounds (Fig  
129 2C). Among these inhibitors, MK-2206 is particularly relevant since it has an allosteric  
130 mechanism of action. Such activity was confirmed when analyzing pAKT levels. It was clear  
131 that in contrast to the ATP-competitive type of inhibitors that trigger the accumulation of  
132 inactive pAKT, MK-2206 abrogated the phosphorylation of AKT, yet leading to similar  
133 inhibition of GSK3 $\beta$  and PRAS40 phosphorylation (Fig 2C).

134 To get **genetic evidence to further support the** involvement of AKT in the regulation of PCNA  
135 ubiquitylation we **used siRNAs against** AKT. Consistently, targeted AKT silencing  
136 recapitulated the effects of pharmacological AKT inhibition, thus confirming AKT  
137 **participation** PCNA ubiquitylation (Fig 2D). Together, the experiments of pharmacological  
138 AKT inhibition and siRNA led to the conclusion that AKT promotes PCNA ubiquitylation after  
139 UV irradiation.

140

141

142 **3- AKT promotes the induction of PCNA ubiquitylation after UV but does not modulate**  
143 **PCNA ubiquitylation in unperturbed cells.**

144 To get further insight into the signaling axis in which AKT promotes the ubiquitylation of  
145 PCNA, we explored the inhibition of multiple kinases that could be involved in the direct or  
146 indirect activation of AKT in response to UV. Unsurprisingly, the inhibition of the widely  
147 characterized upstream kinase PI3K led to a strong inhibition of PCNA ubiquitylation (Fig  
148 3A). This result clearly demonstrates that if pAKT levels are depleted, the induction of ubi-  
149 PCNA after UV irradiation is critically impaired. PI3K is involved in AKT activation in response  
150 to several physiological ligands<sup>19</sup>, but was not directly linked to AKT activation after  
151 genotoxic stimuli. Therefore, we explored the DNA damage response Kinases ATM, ATR and  
152 DNA PKcs. Interestingly, while both ATM and ATR inhibition did not block the induction of  
153 PCNA ubiquitylation after UV, the inhibition of DNA PKcs impaired PCNA ubiquitylation (Fig  
154 3A). DNA PKcs inhibition also showed an additive effect when combined with a suboptimal  
155 dose of the AKT inhibitor C11 (Fig 3B), thus suggesting that both kinases are part of the  
156 same cellular response to promote PCNA ubiquitylation. Given that AKT is a direct  
157 phosphorylation target of DNA PKcs in response to UV irradiation <sup>20</sup>, this set of findings  
158 indicate that UV-induced DNA damage might be the trigger that activates AKT to promote  
159 PCNA ubiquitylation. In line with this notion, we observed that none of the inhibitors that  
160 blocked the induction of PCNA ubiquitylation after UV (including the potent AKT inhibitor  
161 C11) were able to alter the basal levels of PCNA ubiquitylation of unperturbed cells (Fig 3C).  
162 This conclusion was further supported by experiments using siRNAs against the PCNA de-  
163 ubiquitinase USP1<sup>21</sup>. Under unperturbed conditions, knockdown of USP1 led to a substantial



164 increase of PCNA ubiquitylation, which was only slightly attenuated by AKT inhibition (Fig  
165 3D). Therefore, we concluded that AKT is required for efficient PCNA ubiquitylation in  
166 response to the replication stress induced by UV irradiation.

167 **4- AKT inhibition impairs the recruitment of the Translesion DNA Synthesis polymerase  $\eta$**   
168 **to damaged DNA sites.**

169 The next important step was to confirm if the blockage of PCNA ubiquitylation triggered by  
170 AKT inhibition suffices to alter functional parameters of Translesion DNA Synthesis (TLS).  
171 Since ubi-PCNA is required for efficient targeting of TLS polymerases to sites of DNA damage  
172 <sup>22</sup>, we initially studied the recruitment of the TLS polymerase  $\eta$  to Damaged DNA sites. To  
173 analyse such recruitment in large cell populations, we first cloned a hydrophilic linker (H)  
174 between Pol  $\eta$  and GFP, which allowed the expression of high levels of exogenous Pol  $\eta$   
175 without apparent toxicity. Then, we generated a cell line that stably expresses GFP-H-Pol  $\eta$   
176 using lentiviral transduction and puromycin selection (supp Fig 3A). With this cell line, two  
177 complementary approaches were used to study the recruitment of Pol  $\eta$  to damaged sites:  
178 1) local UV irradiation through polycarbonate shields and 2) total UV irradiation followed  
179 by Triton extraction. The use of polycarbonate shields with 5  $\mu$ m pores allows the irradiation  
180 of discrete areas within the nuclei (Fig 4A), which can be identified by immunofluorescence  
181 with antibodies against one of the main types of UV-induced DNA lesions: the cyclobutane  
182 pyrimidine dimers (CPDs). Then, within those damaged areas we studied the efficiency of  
183 recruitment of GFP-H-Pol  $\eta$  with or without AKT inhibition. While in control conditions GFP-  
184 H-Pol  $\eta$  recruitment was observed in essentially every CPD-positive cell, less than 50% of  
185 CPD-positive cells showed detectable GFP-H-Pol  $\eta$  recruitment when AKT was inhibited (Fig

186 4B). To confirm this result, we used a method based on total UV irradiation (Fig 4C). In this  
187 case the complete MW plate was irradiated with a lower UV dose and, prior to fixation, the  
188 cells were treated with a short pulse of PBS containing 0.1% Triton. As such, the chromatin  
189 bound fraction of GFP-H-Pol  $\eta$  remains loaded at DNA damage areas while the soluble  
190 fraction is washed away. To quantify the total GFP-H-Pol  $\eta$  fluorescence from the cells, we  
191 developed an Image J Macro that uses DAPI for nuclei identification and segmentation.  
192 After using this Macro to quantify several images of each condition, we concluded that AKT  
193 inhibition severely impairs GFP-H-Pol  $\eta$  chromatin retention after UV irradiation (Fig 4D).  
194 Thus, AKT inhibition impairs two functional parameters of TLS: PCNA ubiquitylation and TLS  
195 polymerases recruitment to DNA damage sites.

196 The data available so far indicated that TLS is impaired when AKT is inhibited after UV  
197 irradiation. To obtain further evidence to consolidate this conclusion, we performed DNA  
198 combing experiments to study DNA replication fork processivity after UV. If TLS activation  
199 is affected after AKT inhibition, DNA replication fork processivity should be impaired.  
200 Sequential pulses of CldU and IdU were performed in UV-irradiated cells (Fig 4E). The  
201 measurement of the track length of dual color DNA fibers allowed us to determine the  
202 relative processivity of DNA replication forks. We observed a significant decrease in the  
203 average speed of ongoing DNA elongation when UV irradiated cells were treated with AKT  
204 inhibitors (Fig 4F). Such impaired processivity of replication forks is in line with the effect of  
205 AKT inhibition on ubi-PCNA levels and on the recruitment of the TLS polymerase  $\eta$  to  
206 damaged sites (Figs 2 and 4). Together, these results indicate that TLS activity after UV

207 depends on AKT function, and therefore, that AKT inhibition could be used to inhibit TLS  
208 activation.

209 **5- AKT inhibition induces replication-associated DNA damage and cell death after UV.**

210 Since AKT promotes TLS activation, we figured that AKT inhibition in UV-irradiated cells  
211 should lead to increased replication stress, DNA damage and potentially cell death. To test  
212 this hypothesis, we first explored the phosphorylation of histone H2AX as a broad marker  
213 of DNA damage. Interestingly, while  $\gamma$ H2AX did not increase after AKT inhibition in non-  
214 irradiated cells, it significantly increased after UV irradiation (Fig 5A and **supp Fig 3B**), thus  
215 suggesting that the increased H2AX phosphorylation in these cells could be linked to the  
216 inhibition of TLS. Cell cycle analysis revealed that AKT inhibition did not induce a  
217 substantial change in the profile of non-irradiated cells (Fig 5B), triggering only a small  
218 increase in the sub-G1 population (Fig 5B). As expected, UV irradiation led to a noticeable  
219 accumulation of cells in S-phase as a result of replication stress (Fig 5B). Remarkably, when  
220 UV irradiation was combined with AKT inhibition, a substantial increase in the sub-G1  
221 population was observed (Fig 5B), thus suggesting the rapid activation of the apoptotic  
222 program in these cells. The confirmation of cell death induction by UV irradiation combined  
223 with AKT inhibition was performed using the cell death stain sytox red, which showed a  
224 pronounced decrease of cell viability (Fig 5C). Taken together, these experiments confirmed  
225 that AKT inhibition is more toxic in the context of UV irradiation, presumably due to its  
226 impact on PCNA ubiquitylation and TLS activation.

227

228 **6- AKT inhibition after UV triggers synthetic lethality in homologous recombination**  
229 **deficient cells**

230 The main goal of this work was to perform *proof-of-concept* experiments to test the  
231 hypothesis that inhibiting PCNA ubiquitylation should become increasingly toxic in cellular  
232 backgrounds with deficient homologous recombination repair (HR). To test this, we used a  
233 method developed in our lab, in which HR-proficient and HR-deficient cells are co-cultured  
234 in the same well, followed by the quantification of the percentage of cells of each  
235 population that survive the treatment (Fig 6A). In this experimental setting, HR-deficiency  
236 in isogenic genetic backgrounds is artificially induced by lentiviral transduction of shRNAs  
237 against BRCA1. The downregulation of BRCA1 was assessed by western blot and the  
238 inhibition of HR was confirmed using the direct repeats method from Maria Jasin's Lab  
239 (Supp Fig 4A and B). Since HR-proficient (shSCR) and HR-deficient cells (shBRCA1) are tagged  
240 with different fluorescent proteins, the relative viability of both cell populations is  
241 determined at the end of the experiment by cell counting using automated flow cytometry  
242 (Fig 6A). This assay allows to discriminate if a given treatment (or a combinations of  
243 treatments) is equally or selectively toxic for a given genetic background (Fig 6A). As a  
244 positive control of synthetic lethality induction we used Olaparib (Fig 6B), a well  
245 characterized PARP inhibitor that induce SL in HR-deficient cells <sup>23</sup>. Remarkably, when  
246 combining UV irradiation and AKT inhibition, a strong induction of SL was observed in a UV-  
247 dose dependent manner using C11 and other AKT inhibitors (Fig 6C). To exclude potential  
248 artifacts derived from the co-culture of BRCA1-proficient and deficient populations we also  
249 performed a clonogenic assay using single cell cultures. We observed a decreased

250 clonogenic potential in C11-treated HR-deficient cells when compared to C11-treated HR  
251 proficient cells (Fig 6D).

252 To validate this SL phenotype in different genetic backgrounds, we performed survival  
253 experiments with multiple pairs of isogenic and non-isogenic cell lines (HR-proficient vs HR-  
254 deficient). We used a pair of triple negative breast cancer cell lines (MDA-MB 231-BRCA1wt  
255 vs MDA-MB 436-BRCA1KO), a set of wt MEF (shSCR vs shBRCA1), a hamster BRCA2 KO cell  
256 line with its reconstituted counterpart (VC8 vs VC#13) and a pair HCT116 cells (shSCR vs  
257 shBRCA2). *A sine qua non* to use these cell lines was the selective sensitivity to Olaparib in  
258 the BRCA-deficient counterpart of each pair (supp Fig 4C). In all cell lines, AKT inhibition  
259 impaired PCNA ubiquitylation induction (Fig 6E) and triggered SL in the HR-deficient  
260 counterpart of each cell pair after UV (Optimal SL doses are depicted in Fig 6E and full dose-  
261 response panels in supp Fig 4C).

262 Taken together, these results allowed us to conclude that AKT inhibition in the context of  
263 UV irradiation triggers synthetic lethality in HR-deficient cells.

## 264 **7- Direct inhibition of PCNA ubiquitylation is synthetic lethal in HR-deficient cells**

### 265 **submitted to replication stress**

266 While our data clearly showed that AKT inhibition impairs PCNA ubiquitylation (Fig 2) and  
267 triggers SL in HR-deficient backgrounds **after UV** (Fig 6), a direct causality between ubi-PCNA  
268 decrease and SL induction **cannot** to be claimed given the multiple roles of AKT in cell  
269 survival pathways<sup>13</sup>. Hence, we used additional experimental models to **study the**  
270 **contribution of PCNA ubiquitylation to the cell survival of UV-irradiated HR-deficient cells.**

271 Our **initial** approach was to downregulate RAD18, the E3-ligase in charge of PCNA mono-

272 ubiquitylation<sup>24</sup>. We used a lentiviral shRNA transduction protocol to knockdown RAD18.  
273 We tested 4 different shRNA sequences and selected two that promoted strong RAD18  
274 downregulation and that severely impaired PCNA ubiquitylation after UV (Fig 7A and B).  
275 Then, we adapted our SL induction assay to assess the impact of RAD18 knockdown in the  
276 differential survival linked to UV irradiation and HR proficiency (Figure 7C). Increased  
277 sensitivity to UV in shRAD18-transduced cells was observed exclusively in the HR-deficient  
278 cell line, but not in the isogenic HR-proficient cell line (Fig 7D and supp Fig 4D). **While this**  
279 **result indicates that the inhibition of PCNA ubiquitylation could be triggering SL in HR-**  
280 **deficient cells exposed to UV, the fact that RAD18 might be ubiquitylating other HR relevant**  
281 **targets complicates the drawing of a simple cause-effect conclusion. Therefore, we also**  
282 **used a Knock-in MEF model, where wt PCNA was replaced by a non-ubiquitylable version**  
283 **harboring the point mutation K164R<sup>25</sup>. We first confirmed that PCNA<sup>K164R</sup> cells do not**  
284 **display induction of PCNA ubiquitylation after UV (Fig 7E). Later on, we performed survival**  
285 **experiments in which BRCA1 was downregulated by lentiviral shRNAs in both PCNA<sup>WT</sup> and**  
286 **PCNA<sup>K164R</sup> MEFs. Remarkably, a strong SL induction was observed in BRCA1-deficient**  
287 **PCNA<sup>K164R</sup> cells (Fig 7F). These results** consolidate our findings that ubi-PCNA impairment  
288 leads to SL induction in HR-deficient cells, and demonstrates that a targeted blockage of  
289 PCNA ubiquitylation by different experimental approaches suffices to induce SL. While  
290 these data put forward a novel therapeutic strategy to selectively kill HR-deficient cells, an  
291 obvious limitation from these experiments is that UV irradiation cannot be used as a  
292 sensitizer in a clinical setup. Thus, we decided to evaluate cisplatin, a well characterized  
293 replication stress inducer that requires active TLS for DNA damage processing<sup>26</sup>. Strikingly,

294 the HR-deficient counterpart of both shRAD18 transduced cells and PCNA<sup>K164R</sup> MEF  
295 displayed increased sensitivity to cisplatin (Fig 7G and H, respectively). Collectively, these  
296 results unveil the potential of inhibiting PCNA ubiquitylation as a therapeutic strategy to  
297 sensitize HR-deficient cells to treatments that induce replication stress and activation of  
298 TLS.  
299

300 **Discussion**

301 *A new function for AKT in the promotion of cell survival: the regulation of DNA damage*  
302 *tolerance.*

303 A central regulatory affair for cell survival is to balance DNA repair and apoptosis induction  
304 in response to DNA damage load. Since DNA damage is an unceasing threat arising from  
305 both endogenous and exogenous sources<sup>27</sup>, DNA repair pathways are unable to cope with  
306 every single DNA damage event in real time, in particular at sensitive points of the cell cycle  
307 such as S-phase<sup>28</sup>. Hence, a series of specialized mechanisms have evolved to deal with  
308 unrepaired DNA damage in S-phase to promote cell survival and to increase the time-frame  
309 for DNA repair mechanisms to attend the damage, which are collectively referred as DNA  
310 damage tolerance pathways<sup>22,29</sup>. The most well characterized tolerance pathways are  
311 template switch and TLS, two related mechanisms to deal with damaged DNA in S-phase  
312 which share a common player: ubiquitylated PCNA<sup>30</sup>. While TLS involves mono ubi-PCNA  
313 and template switch involves poly ubi-PCNA, the poly-ubiquitylation of PCNA requires the  
314 initial mono-ubiquitylation at the same K164 residue<sup>30</sup>. Thus, the inhibition of PCNA mono-  
315 ubiquitylation also implies the inhibition of PCNA poly-ubiquitylation, and the potential  
316 impairment of both DNA damage tolerance pathways.

317 The findings of this paper unveil a novel pro-survival role for AKT, the modulation of PCNA  
318 ubiquitylation. Our data not only consistently demonstrate such new role by  
319 pharmacological and siRNA-mediated inhibition of AKT (Fig 2 and Supp Fig 2), but also prove  
320 that blocking PCNA ubiquitylation through AKT inhibition modifies functional parameters of  
321 TLS, such as TLS polymerases recruitment to damage sites, replication forks processivity,



322 replication stress induction and cell survival after UV irradiation (Figs 4 and 5). Regarding  
323 the upstream players of AKT activation in the context of replication stress, there is  
324 compelling evidence suggesting that the master DNA Damage Response (DDR) kinase DNA-  
325 PKcs regulates AKT through direct phosphorylation at Ser 473 in response to ionizing DNA  
326 damage<sup>31-33</sup> and UV irradiation<sup>20</sup>. Our results indicate that DNA PKcs is the DDR kinase  
327 that might be coordinating AKT activation to promote PCNA ubiquitylation in response to  
328 UV. Given the results with the inhibitor LY294002 (Fig 3A), we cannot exclude that PI3K also  
329 participates in the same or a parallel pathway that DNA PKcs in response to replication  
330 stress. Nonetheless, a clear conclusion from our results is that the basal levels of PCNA  
331 ubiquitylation are not affected by any of these kinases, including AKT itself (Fig 3C). Thus, it  
332 is feasible that a replication stress-triggered axis involving DNA PKcs and AKT is activated to  
333 promote PCNA ubiquitylation and TLS when damaged DNA accumulate in cells.

334 An important question that remains open for future studies is the identity of the  
335 downstream AKT targets responsible of promoting PCNA ubiquitylation, and whether this  
336 occurs directly through the phosphorylation of relevant substrates by AKT or if it requires a  
337 more complex signaling cascade. Potential starting points for this research are some of the  
338 kinases identified as hits in the screening performed herein, such as IKK and p38  
339 (supplementary table 1). Nonetheless, omics approaches such as RNAseq or phosphor-  
340 proteomics comparing UV-irradiated +/- AKT inhibitors will most likely be required to tackle  
341 this issue in a more comprehensive manner. It will also be important to study in more detail  
342 the TLS regulatory proteins RAD18 and REV1 since two lines of evidence suggest that an axis  
343 involving AKT/REV1/RAD18 could modulate PCNA ubiquitylation. First, a recent report

344 showed that increased REV1 levels boost PCNA ubiquitylation after UV irradiation through  
345 the direct interaction with RAD18<sup>34</sup>. Second, the deletion mutant of yeast AKT homolog  
346 Sch9 displays reduced levels of REV1 and impaired TLS<sup>35</sup>.

347 In this paper we establish for the first time a connection between AKT and DNA damage  
348 tolerance through TLS activation. Interestingly, AKT has also been linked to the modulation  
349 of DNA repair pathways to promote cell survival yet compromising genome stability, which  
350 can be considered as additional DNA damage tolerance strategies. One clear example is the  
351 modulation of mismatch repair (MMR) by AKT, through the control of the stability and  
352 localization of the MMR protein hPMS2<sup>36</sup>. Since the induction of apoptosis by base adducts  
353 like O6MeG requires active MMR, the attenuation of MMR by AKT might promote cell  
354 survival in this context, yet increasing the chances of acquiring mutations<sup>37</sup>. Another  
355 example of the activation of error-prone DNA repair mediated by AKT to promote cell  
356 survival is the stimulation of non-homologous end joining, NHEJ, by collaborating with DNA  
357 PKcs (reviewed in<sup>37</sup>). Hence, our work builds up on an emerging role for AKT and DNA PKcs  
358 in DNA damage tolerance, which will be of great importance to understand the mechanisms  
359 that govern the choice between cell survival and cell death triggered in response to DNA  
360 damage.

361

362 *TLS inhibition as a novel therapeutic strategy against HR-deficient cancers.*

363 Reports by many different groups showed that PCNA ubiquitylation and ubiquitin binding  
364 domains on TLS polymerases are less critical for cell survival in mammalian cells than in  
365 yeast. On the one hand, it was reported by different groups that to boost the sensitivity

366 associated with TLS inhibition in different cellular models, a concomitant inhibition of  
367 checkpoint activation by caffeine treatment is required <sup>38,39</sup>, thus showing that the  
368 intricate DDR network in mammals is able to buffer TLS impairment. On the other hand,  
369 critical evidence of the relevance of PCNA ubiquitylation came with the generation of a  
370 mammalian knock-in model of non-ubiquitylable PCNA <sup>25,40</sup>. The PCNA K164R MEFs  
371 obtained showed increased -yet moderate- UV sensitivity when compared to wt MEFs, in  
372 particular at low UV doses <sup>40</sup>. Such mild UV-triggered sensitivity observed in mammalian  
373 cells in comparison to the extreme phenotype observed in yeast <sup>1</sup>, along with the central  
374 housekeeping roles of PCNA in DNA replication <sup>41,42</sup>, discouraged the field from further  
375 exploring the therapeutic potential of targeting PCNA ubiquitylation. However, the  
376 possibility that some genetic backgrounds could depict enhanced sensitivity to TLS  
377 inhibition remained almost completely unexplored. In such context, the driving hypothesis  
378 of this work was that the UV sensitivity associated to PCNA ubiquitylation inhibition could  
379 become much stronger in DNA repair-deficient contexts. In particular, we were interested  
380 in exploring HR-deficient contexts, due to the complementary and compensatory role that  
381 HR plays with TLS during replication stress <sup>28</sup>. Moreover, recent reports revealed that HR  
382 deficiency is a much more widely spread feature of human cancers than anticipated <sup>23,43</sup>,  
383 and therefore it is a niche of critical importance for drug discovery and for the design of  
384 novel therapeutic strategies.

385 The rationale we followed was that the sole inhibition of TLS would be insufficient to trigger  
386 substantial lethality of HR-deficient cells, and therefore should be combined with  
387 replication stress inducers such as UV or cisplatin. When we inhibited PCNA ubiquitylation

388 by AKT inhibition, RAD18 knockdown or using a knock-in model of non-ubiquitylable PCNA,  
389 we observed synthetic lethality (SL) induction in BRCA-deficient cells (Figs 6 and 7), thus  
390 indicating that the targeted inhibition of DNA damage tolerance pathways is selectively  
391 toxic when cells are deficient in homologous recombination. These results are promising  
392 and put forward the use of pharmacological TLS inhibitors as sensitizers of widely used  
393 replication poisons such as cisplatin, which are currently the standard of care for HR-  
394 deficient cancers <sup>23</sup>. Moreover, these findings also suggest that PCNA ubiquitylation  
395 inhibitors would be of therapeutic utility to counteract the resistance to cisplatin, which has  
396 been linked in the past to the overexpression of TLS polymerases <sup>44-46</sup>. While some currents  
397 efforts to inhibit TLS by targeting TLS polymerases have been reported <sup>11</sup>, we believe that  
398 inhibiting PCNA ubiquitylation should have a more robust effect on TLS inhibition, since it  
399 would have a universal effect on the recruitment of TLS polymerases. This notion is  
400 supported by our previous work with the TLS inhibitor p21, which is able to block the  
401 recruitment of all TLS polymerases to DNA damage sites, thus impacting on TLS efficiency  
402 <sup>12,47</sup>. Taken together, our data put forward a novel model of synthetic lethality induction  
403 with great therapeutic potential against HR-deficient cancer cells, where TLS inhibition can  
404 act as a strong sensitizer for the specific killing of cells submitted to replication stress.  
405 Excitingly, in this context our findings also propose a new therapeutic utility for AKT  
406 inhibitors that are currently in clinical trials <sup>48,49</sup>, which might be used in combination with  
407 replication stress inducers in patient cohorts with known HR deficiencies.

## 408 **Materials and methods**

### 409 DNA constructs, shRNA and siRNA

410 The parental GFP-Pol $\eta$  plasmid was a gift from Dr. Alan Lehmann. GFP-H-Pol $\eta$  was obtained  
411 by cloning a flexible hydrophilic linker between Pol $\eta$  and GFP using XhoI restriction site<sup>50</sup>.  
412 For stable expression, GFP-H-Pol $\eta$  was cloned into pLenti (w175-1) vector through BamHI  
413 and XbaI restriction sites. shRAD18 lentiviral vectors were purchased from Origene (#1:  
414 TL302132C; #2: TL302132B; #3: TL302132D; #4: TL302132A). shBRCA1 (TRCN0000010305,  
415 Sigma-Aldrich) was cloned into pLKO.1-TRC vector through EcoRI and AgeI restriction sites;  
416 and shSCR-pLKO.1 was purchase from Addgene (ID#1864). The siRNA duplexes used (Cell  
417 Signaling Technology) were: siSCR (control) 6568S and siAKT 6211S.

### 418 Antibodies

419 Primary antibodies used were:  $\alpha$ -ubiquityl-PCNA (D5C7P; Cat# 13439),  $\alpha$ -PCNA (PC-10; Cat#  
420 2586),  $\alpha$ -pan-Akt (Cat# 4691),  $\alpha$ -phospho-Akt (Ser473; Cat# 9271),  $\alpha$ -phospho-GSK3B (Ser9;  
421 Cat# 9336),  $\alpha$ -phospho-PRAS40 (Thr246; Cat# 2997),  $\alpha$ -RAD18 (Cat# 9040) and  $\alpha$ -SMC-1  
422 (Cat# 4802) from Cell Signaling Technology;  $\alpha$ -BRCA1 (Ab-1) from Oncogene Research;  $\alpha$ -  
423 PCNA (PC-10, Cat# sc-56) from SCBT;  $\alpha$ - $\gamma$ H2AX (Cat# 05-636-1) from Millipore;  $\alpha$ -CPD (Cat#  
424 NMDND001) from Cosmo Bio;  $\alpha$ -Tubulin (Cat# T9026) from Sigma-Aldrich. Secondary  
425 antibodies used were:  $\alpha$ -mouse Alexa Fluor 594 from Jackson ImmunoResearch; goat  $\alpha$ -  
426 mouse IRDye 680RD (Cat# P/N 925-68070) and goat  $\alpha$ -rabbit IRDye 800CW (Cat# P/N 925-  
427 32211) from LI-COR Biosciences. Nuclei were stained with DAPI (Cat# D9542) from Sigma-  
428 Aldrich.

### 429 Cell culture, transfections and UV irradiation.

430 U2OS, MDA-MB 231 and 436 cell lines were acquired from ATCC. U2OS cells stably  
431 expressing DR-GFP were kindly provided by M. Jasin<sup>54</sup>. PCNA wt and PCNA K164R MEF cell  
432 lines were previously described by H. Jacobs<sup>25</sup>. HCT116<sup>p21<sup>-/-</sup></sup> were kindly provided by B.  
433 Vogelstein. V-C8 cell lines were supplied by B. Lopez. U2OS cell lines were cultured in DMEM  
434 medium (Thermo Fisher Scientific) supplemented with 5% FBS (GIBCO). Remaining cell lines  
435 were cultured in DMEM medium supplemented with 10% FBS. HEK293T cells were  
436 transfected to obtain virus particles using JetPrime (Polyplus-transfection) according to  
437 manufacturer's instructions. siRNAs (100–200 nM) were transfected into cells at 40%  
438 confluence, using JetPrime (Polyplus-transfection). Local and global UV irradiation was  
439 performed as previously described<sup>51</sup>. All the cell lines used in this work were negative for  
440 mycoplasma contamination.

#### 441 Protein analysis

442 For direct western blot analysis, samples were lysed in commercial Laemmli buffer (BioRad)  
443 with reducing agent 2-mercaptoethanol. The detection and quantification were performed  
444 with Odyssey Clx System (LI-COR Biosciences) through the Image Studio Software.

#### 445 Immunofluorescence and image analysis

446 Immunofluorescence and CPD staining were performed as described previously<sup>51</sup>. For GFP-  
447 H-Pol  $\eta$  foci detection, cells were pre-extracted with 0.1% Triton for 5 min on ice prior  
448 fixation. This method allows detection of only well-assembled foci. Images were captured  
449 using an optical microscope equipped with a motorized stage (Leica DMI 8). To quantify the  
450 total GFP or  $\gamma$ H2AX fluorescence, an Image J Macro was developed using DAPI for nuclei  
451 identification and segmentation.

452 Cell-cycle and cell death analysis.

453 For cycle analysis, cells were prepared as described previously<sup>52</sup>. SYTOX Red (Thermo Fisher  
454 Scientific) was used for dead cell staining according as previously described<sup>53</sup>. Stained  
455 samples were subjected to FACS (Attune NxT, Thermo Fisher Scientific) and data were  
456 analyzed using FlowJo software (FlowJo LLC). When indicated, the profiles shown were  
457 obtained by gating the positive cells by dual-channel FACS analysis.

458 Preparation and immunolabelling of DNA combing

459 DNA combing was performed according to our previously described protocol<sup>12</sup> with  
460 modifications. Briefly, cells were irradiated with 15 J/m<sup>2</sup> UVC and treated or not with C11  
461 (0.5 µM). After 16 h of treatment, cells were pulse labeled with CldU (20 mM) for 10 min,  
462 washed twice, and incubated with IdU (200 mM) for additional 30 min (200 mM). DNA fibers  
463 were visualized using a Zeiss Axioplan confocal microscope. Images were analyzed using  
464 Zeiss LSM Image Browser software. Only bi-colored fibers were quantified to ensure that  
465 only active replication forks, but neither terminations nor recently fired origins, were  
466 analyzed.

467 Clonogenic assay

468 750 HCT116<sup>p21</sup><sup>-/-</sup> shSCR or shBRCA1 cells were plated in a 96 MW format. Cells were treated  
469 with a combination of AKT inhibition (C11 0.1 uM) and UV irradiation and after 6 days the  
470 survival fraction was stained with crystal violet.

471

472 Homologous recombination analysis

473 We used an HR assay generated previously in U2OS cells containing an integrated HR  
474 reporter substrate DR-GFP<sup>54</sup> with some modifications described previously<sup>52</sup>.

#### 475 Statistical analysis

476 All experiments were performed by duplicate or triplicate. Graphs and statistical analysis  
477 were performed using GraphPad Prism 5.0 (GraphPad Software), applying two-sided  
478 Student's t-test and ANOVA test as appropriate. Bars represent the mean value  $\pm$  s.d. Other  
479 calculations were performed using Microsoft Excel 2003.

480

481

#### 482 **Acknowledgments**

483 We thank the flow cytometry, microscopy and cell culture facilities of CIBICI-CONICET for  
484 technical support. We thank Nicolas Nieto Moreno for careful reading of the manuscript  
485 and helpful suggestions. We would like to thank Gerard Drewes of CellZome (a GSK  
486 company) for his scientific advice. This work was supported by a Start-up grant from the  
487 Fondo para la Investigación Científica y Tecnológica (FONCyT PICT start-up 2013-1553), **by**  
488 **KWF projects 10796/2016-2 and 10032/2016-1 to H. J. and** by a consortium grant of  
489 FONCyT and the Trust in Science (Global Health R&D) from GlaxoSmithKline (PAE-GLAXO  
490 2014-0005). S.M, V.G., J.L.B. and G.S. are researchers from CONICET. F.V., I.A.G., S.C. and  
491 M.C.L were supported by fellowships from FONCyT, M.F.P. and L.G. were supported by  
492 fellowships from the National Institute of Cancer and CONICET.

493

#### 494 **Conflict of interest**



495 No conflict of interest reported

## 496 Bibliography

- 497 1 Hoege C, Pfander B, Moldovan G-L,  
498 Pyrowolakis G, Jentsch S. RAD6-  
499 dependent DNA repair is linked to  
500 modification of PCNA by ubiquitin and  
501 SUMO. *Nature* 2002; **419**: 135–141.  
502
- 503 2 Soria G, Podhajcer O, Prives C, Gottifredi  
504 V. P21Cip1/WAF1 downregulation is  
505 required for efficient PCNA  
506 ubiquitination after UV irradiation.  
507 *Oncogene* 2006; **25**: 2829–2838.  
508
- 509 3 Niimi A, Brown S, Sabbioneda S,  
510 Kannouche PL, Scott A, Yasui A *et al.*  
511 Regulation of proliferating cell nuclear  
512 antigen ubiquitination in mammalian  
513 cells. *Proc Natl Acad Sci U S A* 2008; **105**:  
514 16125–16130.  
515
- 516 4 Brun J, Chiu RK, Wouters BG, Gray DA.  
517 Regulation of PCNA polyubiquitination  
518 in human cells. *BMC Res Notes* 2010; **3**.  
519 doi:10.1186/1756-0500-3-85.  
520
- 521 5 Wit N, Buoninfante OA, Van Den Berk  
522 PCM, Jansen JG, Hogenbirk MA, De  
523 Wind N *et al.* Roles of PCNA  
524 ubiquitination and TLS polymerases  $\kappa$   
525 and  $\eta$  in the bypass of methyl  
526 methanesulfonate-induced DNA  
527 damage. *Nucleic Acids Res* 2015; **43**:  
528 282–294.  
529
- 530 6 Bienko M, Green CM, Crosetto N, Rudolf  
531 F, Zapart G, Coull B *et al.* Ubiquitin-  
532 binding domains in Y-family  
533 polymerases regulate translesion  
534 synthesis. *Science* 2005; **310**: 1821–  
535 1824.  
536
- 537 7 McIntyre J, Woodgate R. Regulation of  
538 translesion DNA synthesis:  
539 Posttranslational modification of lysine  
540 residues in key proteins. *DNA Repair*  
541 (*Amst*) 2015; **29**: 166–179.  
542
- 543 8 Soria G, Gottifredi V. PCNA-coupled p21  
544 degradation after DNA damage: The  
545 exception that confirms the rule? *DNA*  
546 *Repair (Amst)* 2010; **9**: 358–364.
- 547
- 548 9 Bertolin AP, Mansilla SF, Gottifredi V.  
549 The identification of translesion DNA  
550 synthesis regulators: Inhibitors in the  
551 spotlight. *DNA Repair (Amst)* 2015; **32**:  
552 158–164.  
553
- 554 10 Vaisman A, Woodgate R. Translesion  
555 DNA polymerases in eukaryotes: what  
556 makes them tick? *Crit. Rev. Biochem.*  
557 *Mol. Biol.* 2017; **52**: 274–303.  
558
- 559 11 Yamanaka K, Chatterjee N, Hemann MT,  
560 Walker GC. Inhibition of mutagenic  
561 translesion synthesis: A possible  
562 strategy for improving chemotherapy?  
563 *PLoS Genet* 2017; **13**.  
564 doi:10.1371/journal.pgen.1006842.  
565
- 566 12 Mansilla SF, Soria G, Vallerga MB, Habif  
567 M, Martinez-López W, Prives C *et al.* UV-  
568 triggered p21 degradation facilitates  
569 damaged-DNA replication and  
570 preserves genomic stability. *Nucleic*  
571 *Acids Res* 2013; **41**: 6942–6951.  
572
- 573 13 Manning BD, Toker A. AKT/PKB  
574 Signaling: Navigating the Network. *Cell.*  
575 2017; **169**: 381–405.  
576
- 577 14 Manning BD, Cantley LC. AKT/PKB  
578 signaling: navigating downstream. *Cell*  
579 2007; **129**: 1261–74.  
580
- 581 15 Song G, Ouyang G, Bao S. The activation  
582 of Akt/PKB signaling pathway and cell  
583 survival. *J Cell Mol Med* 2005; **9**: 59–71.  
584
- 585 16 Sabbioneda S, Gourdin AM, Green CM,  
586 Zotter A, Giglia-Mari G, Houtsmuller A *et*  
587 *al.* Effect of proliferating cell nuclear  
588 antigen ubiquitination and chromatin  
589 structure on the dynamic properties of  
590 the Y-family DNA polymerases. *Mol Biol*  
591 *Cell* 2008; **19**: 5193–202.  
592
- 593 17 Wu YT, Ouyang W, Lazorchak AS, Liu D,  
594 Shen HM, Su B. mTOR complex 2 targets  
595 Akt for proteasomal degradation via  
596 phosphorylation at the hydrophobic

- 597 motif. *J Biol Chem* 2011; **286**: 14190–  
598 14198.  
599
- 600 18 Han EKH, Leverson JD, McGonigal T,  
601 Shah OJ, Woods KW, Hunter T *et al.* Akt  
602 inhibitor A-443654 induces rapid Akt  
603 Ser-473 phosphorylation independent  
604 of mTORC1 inhibition. *Oncogene* 2007;  
605 **26**: 5655–5661.  
606
- 607 19 Martini M, De Santis MC, Braccini L,  
608 Gulluni F, Hirsch E. PI3K/AKT signaling  
609 pathway and cancer: An updated  
610 review. *Ann. Med.* 2014.  
611 doi:10.3109/07853890.2014.912836.  
612
- 613 20 Tu Y, Ji C, Yang B, Yang Z, Gu H, Lu CC *et al.*  
614 DNA-dependent protein kinase  
615 catalytic subunit (DNA-PKcs)-SIN1  
616 association mediates ultraviolet B  
617 (UVB)-induced Akt Ser-473  
618 phosphorylation and skin cell survival.  
619 *Mol Cancer* 2013. doi:10.1186/1476-  
620 4598-12-172.  
621
- 622 21 Huang TT, Nijman SMB, Mirchandani  
623 KD, Galardy PJ, Cohn MA, Haas W *et al.*  
624 Regulation of monoubiquitinated PCNA  
625 by DUB autocleavage. *Nat Cell Biol*  
626 2006. doi:10.1038/ncb1378.  
627
- 628 22 Sale JE, Lehmann AR, Woodgate R. Y-  
629 family DNA polymerases and their role  
630 in tolerance of cellular DNA damage.  
631 *Nat Rev Mol Cell Biol* 2012; **13**: 141–152.  
632
- 633 23 Lord CJ, Ashworth A. BRCAness  
634 revisited. *Nat Rev Cancer* 2016; **16**: 110–  
635 120.  
636
- 637 24 Zhang W, Qin Z, Zhang X, Xiao W. Roles  
638 of sequential ubiquitination of PCNA in  
639 DNA-damage tolerance. *FEBS Lett.*  
640 2011; **585**: 2786–2794.  
641
- 642 25 Langerak P, Nygren AOH, Krijger PHL,  
643 van den Berk PCM, Jacobs H. A/T  
644 mutagenesis in hypermutated  
645 immunoglobulin genes strongly  
646 depends on PCNA<sup>K164</sup> modification. *J*  
647 *Exp Med* 2007; **204**: 1989–1998.  
648  
649
- 650 26 Sokol AM, Cruet-Hennequart S, Pasero  
651 P, Carty MP. DNA polymerase  $\eta$   
652 modulates replication fork progression  
653 and DNA damage responses in  
654 platinum-treated human cells. *Sci Rep*  
655 2013; **3**. doi:10.1038/srep03277.  
656
- 657 27 Jackson SP, Bartek J. The DNA-damage  
658 response in human biology and disease.  
659 *Nature* 2009; **461**: 1071–1078.  
660
- 661 28 Sale JE. Competition, collaboration and  
662 coordination--determining how cells  
663 bypass DNA damage. *J Cell Sci* 2012;  
664 **125**: 1633–1643.  
665
- 666 29 Branzei D, Szakal B. DNA damage  
667 tolerance by recombination: Molecular  
668 pathways and DNA structures. *DNA*  
669 *Repair (Amst)*. 2016; **44**: 68–75.  
670
- 671 30 Cipolla L, Maffia A, Bertoletti F,  
672 Sabbioneda S. The regulation of DNA  
673 damage tolerance by ubiquitin and  
674 ubiquitin-like modifiers. *Front. Genet.*  
675 2016; **7**.  
676 doi:10.3389/fgene.2016.00105.  
677
- 678 31 Surucu B, Bozulic L, Hynx D, Parcellier A,  
679 Hemmings BA. In vivo analysis of protein  
680 kinase B (PKB)/Akt regulation in DNA-  
681 PKcs-null mice reveals a role for PKB/Akt  
682 in DNA damage response and  
683 tumorigenesis. *J Biol Chem* 2008; **283**:  
684 30025–30033.  
685
- 686 32 Park J, Feng J, Li Y, Hammarsten O, Brazil  
687 DP, Hemmings BA. DNA-dependent  
688 protein kinase-mediated  
689 phosphorylation of protein kinase B  
690 requires a specific recognition sequence  
691 in the C-terminal hydrophobic motif. *J*  
692 *Biol Chem* 2009; **284**: 6169–6174.  
693
- 694 33 Boehme KA, Kulikov R, Blattner C. p53  
695 stabilization in response to DNA damage  
696 requires Akt/PKB and DNA-PK. *Proc Natl*  
697 *Acad Sci* 2008; **105**: 7785–7790.  
698
- 699 34 Wang Z, Huang M, Ma X, Li H, Tang T,  
700 Guo C. REV1 promotes PCNA  
701 monoubiquitylation through interacting  
702 with ubiquitylated RAD18. *J Cell Sci*

703 2016; **129**: 1223–1233.

704

705 35 Madia F, Wei M, Yuan V, Hu J, Gattazzo  
706 C, Pham P *et al.* Oncogene homologue  
707 Sch9 promotes age-dependent  
708 mutations by a superoxide and  
709 Rev1/Pol $\zeta$ -dependent mechanism. *J Cell*  
710 *Biol* 2009; **186**: 509–523.

711

712 36 Jia J, Zhang Y, Cai J, Wang J, Ding H, Zhou  
713 J *et al.* A novel function of protein kinase  
714 B as an inducer of the mismatch repair  
715 gene hPMS2 degradation. *Cell Signal*  
716 2013; **25**: 1498–1504.

717

718 37 Liu Q, Turner KM, Yung WKA, Chen K,  
719 Zhang W. Role of AKT signaling in DNA  
720 repair and clinical response to cancer  
721 therapy. *Neuro Oncol* 2014; **16**: 1313–  
722 1323.

723

724 38 Despras E, Daboussi F, Hyrien O,  
725 Marheineke K, Kannouche PL. ATR/Chk1  
726 pathway is essential for resumption of  
727 DNA synthesis and cell survival in UV-  
728 irradiated XP variant cells. *Hum Mol*  
729 *Genet* 2010; **19**: 1690–1701.

730

731 39 Despras E, Delrieu N, Garandeau C,  
732 Ahmed-Seghir S, Kannouche PL.  
733 Regulation of the specialized DNA  
734 polymerase  $\eta$ : Revisiting the biological  
735 relevance of its PCNA- and ubiquitin-  
736 binding motifs. *Environ Mol Mutagen*  
737 2012; **53**: 752–765.

738

739 40 Hendel A, Krijger PHL, Diamant N, Goren  
740 Z, Langerak P, Kim J *et al.* PCNA  
741 ubiquitination is important, but not  
742 essential for translesion DNA synthesis  
743 in mammalian cells. *PLoS Genet* 2011; **7**:  
744 e1002262.

745

746 41 Moldovan G-LL, Pfander B, Jentsch S.  
747 PCNA, the Maestro of the Replication  
748 Fork. *Cell* 2007; **129**: 665–679.

749

750 42 Wang SC. PCNA: A silent housekeeper or  
751 a potential therapeutic target? *Trends*  
752 *Pharmacol. Sci.* 2014; **35**: 178–186.

753

754 43 Davies H, Glodzik D, Morganella S, Yates  
755 LR, Staaf J, Zou X *et al.* HRDetect is a  
756 predictor of BRCA1 and BRCA2  
757 deficiency based on mutational  
758 signatures. *Nat Med* 2017; **23**: 517–525.

759

760 44 Ceppi P, Novello S, Cambieri A, Longo M,  
761 Monica V, Lo Iacono M *et al.* Polymerase  
762  $\eta$  mRNA Expression Predicts Survival  
763 of Non Small Cell Lung Cancer Patients  
764 Treated with Platinum-Based  
765 Chemotherapy. *Clin Cancer Res* 2009;  
766 **15**: 1039–1045.

767

768 45 Sharma S, Shah N a, Joiner a M, Roberts  
769 KH, Canman CE. DNA polymerase  $\zeta$  is  
770 a major determinant of resistance to  
771 platinum-based chemotherapeutic  
772 agents. *Mol Pharmacol* 2012; **81**: 778–  
779 787.

770

771 46 Srivastava AK, Han C, Zhao R, Cui T, Dai  
772 Y, Mao C *et al.* Enhanced expression of  
773 DNA polymerase  $\eta$  contributes to  
774 cisplatin resistance of ovarian cancer  
775 stem cells. *Proc Natl Acad Sci U S A* 2015;  
776 **112**: 4411–4416.

777

778 47 Soria G, Speroni J, Podhajcer OL, Prives  
779 C, Gottifredi V. p21 differentially  
780 regulates DNA replication and DNA-  
781 repair-associated processes after UV  
782 irradiation. *J Cell Sci* 2008; **121**: 3271–  
783 3282.

784

785 48 Nitulescu GM, Margina D, Juzenas P,  
786 Peng Q, Olaru OT, Saloustros E *et al.* Akt  
787 inhibitors in cancer treatment: The long  
788 journey from drug discovery to clinical  
789 use (Review). *Int. J. Oncol.* 2016; **48**:  
790 869–885.

791

792 49 Brown JS, Banerji U. Maximising the  
793 potential of AKT inhibitors as anti-  
794 cancer treatments. *Pharmacol. Ther.*  
795 2017; **172**: 101–115.

796

797 50 Leonhardt H, Rahn HP, Weinzierl P,  
798 Sporbert A, Cremer T, Zink D *et al.*  
799 Dynamics of DNA replication factories in  
800 living cells. *J Cell Biol* 2000; **149**: 271–80.

801

802 51 Soria G, Belluscio L, van Cappellen WA,  
803 Kanaar R, Essers J, Gottifredi V. DNA  
804 damage induced Pol  $\eta$  recruitment  
805  
806  
807  
808

809 takes place independently of the cell  
810 cycle phase. *Cell Cycle* 2009; **8**: 3340–  
811 3348.  
812  
813 52 Soria G, Almouzni G. Differential  
814 contribution of HP1 proteins to DNA  
815 end resection and homology-directed  
816 repair. *Cell Cycle* 2013; **12**: 422–429.  
817  
818 53 Joray M, Villafanez F, Gonzales M,  
819 Crespo M, Laiolo J, Palacios S *et al.* P53

820 tumor suppressor is required for  
821 efficient execution of the death  
822 program following treatment with a  
823 cytotoxic limonoid obtained from *Melia*  
824 *azedarach*. *Food Chem Toxicol* 2017; :  
825 pii: S0278-6915(17)30217-X.  
826  
827 54 Pierce AJ. Ku DNA end-binding protein  
828 modulates homologous repair of  
829 double-strand breaks in mammalian  
830 cells. *Genes Dev* 2001; **15**: 3237–3242.  
831

832

833 **Figure legends**

834 **Figure 1: Miniaturized western blot setup to perform a screening of PCNA ubiquitylation**  
835 **inhibitors. A)** U2OS cells were UV-irradiated (15 J/m<sup>2</sup>) and treated for 12 h with the proteasome  
836 inhibitors Epoxomicin and MG-132. The western blot was performed with two monoclonal  
837 antibodies to simultaneously detect total PCNA (in red) and ubi-PCNA (in green) using a LICOR  
838 Odyssey infrared scanner. The ratios of ubi-PCNA/total PCNA were normalized to the highest  
839 induction of ubi-PCNA in the non-treated (NT) UV-irradiated sample. **B)** 3 days detailed protocol  
840 to screen for PCNA ubiquitylation inhibitors, showing the quality controls to ensure  
841 reproducibility and robustness of PCNA ubiquitylation induction: **i) use of an infrared scanner to**  
842 **confirm the homogenous distribution of cells in the wells across the entire plate before the**  
843 **addition of the screening compounds ; ii) Automatized capture of a low magnification brightfield**  
844 **image at the center of each well as a control of the general cytotoxicity of every treatment ; iii)**  
845 **Lysis in benzonase w/o boiling of the samples and direct loading of the samples to the SDS Page**  
846 **gel****C)** Layout of the 96 multi-well (MW) plates used in the screening, showing the disposition of  
847 the non-irradiated and UV-irradiated controls. 80 Kinase inhibitors per plate were evaluated and  
848 8 mini-western blots were run in parallel with the 12 samples from each plate row. **D)** Results of  
849 the screening with 627 kinase inhibitors from the PKIS2 library, tested at 1  $\mu$ M. The distribution  
850 of the normalized ubi-PCNA/total PCNA ratios is shown. The dotted line represents the threshold  
851 of 3 standard deviations that allowed the identification of 22 hits.

852

853 **Figure 2: AKT inhibition impairs PCNA ubiquitylation. A)** U2OS cells were UV-irradiated (15J/m<sup>2</sup>)  
854 and treated for 12 h with the indicated inhibitors at 1  $\mu$ M. The western blot shows the strong

855 PCNA ubiquitylation inhibitory activity found in two structurally related hits: C11 (compound #: 856 GSK1581428A) and G8 (compound #: GSK1389063A). The graph in the lower panel shows the 857 quantification of three independent experiments. Statistical analysis was performed using 858 ANOVA with Tukey Kramer post-test (\*\*\*:  $p \leq 0.001$ ). **B)** U2OS cells were treated as in A) and 859 western blots with specific antibodies were performed to study pAKT, total AKT and p-GSK3 $\beta$  860 levels.  $\alpha$ -tubulin was used as a loading control. **C)** U2OS cells were **pre-treated for 12 hours using** 861 **0.5  $\mu$ M C11 and 5  $\mu$ M of the** structurally unrelated AKT inhibitors: MK-2206 (Merck), AZD5363 862 (AstraZeneca), GSK690693 (GlaxoSmithKline). After UV, all these inhibitors were used at 20  $\mu$ M 863 and C11 was used at 1  $\mu$ M. The normalized ubi-PCNA/total PCNA ratios are shown below the 864 PCNA panel. pAKT, AKT, p-GSK3 $\beta$  and p-PRAS40 western blots were performed at 3 and 12 h post- 865 treatment to confirm the AKT inhibitory activity of each compound. **D)** U2OS cell were 866 transfected with two concentrations of siRNAs. 48 h later cells were UV-irradiated, and after 12h 867 samples were processed for quantification of PCNA ubiquitylation by western blot. A western 868 blot for pan-AKT was performed to confirm the siRNA mediated knockdown. The normalized ubi- 869 PCNA/total PCNA ratios are shown below the PCNA panel.

870

871 **Figure 3: AKT inhibition impairs PCNA ubiquitylation only in the context of replication stress.**

872 **A)** U2OS cells were pre-treated overnight with the indicated kinase inhibitors: PI3K inhibitor 873 (LY294002 50  $\mu$ M), ATR inhibitor (VE-821 1  $\mu$ M), ATM inhibitor (KU-55933 1  $\mu$ M), DNA PKcs 874 inhibitor (NU7026 20  $\mu$ M) and AKT inhibitor (C11 1  $\mu$ M). Cells were then submitted to UV 875 irradiation (15 J/m<sup>2</sup>), and 12 h in the presence of the inhibitors at the same concentrations, 876 **samples were processed by WB for the quantification of ubi/PCNA. B)** U2OS cells were treated in

877 parallel and in combination of suboptimal doses of the AKT inhibitor C11 (0.1  $\mu$ M) and the optimal  
878 dose of the DNA PKcs inhibitor NU7026 (20  $\mu$ M). 12 hs after UV irradiation (15 J/m<sup>2</sup>) samples  
879 were processed by WB for the quantification of ubi/PCNA. **C)** U2OS cells were treated overnight  
880 with the optimal dose of each kinase inhibitor (LY294002 50  $\mu$ M, NU7026 20  $\mu$ M and C11 1  $\mu$ M)  
881 followed by sample processing for WB in unperturbed conditions. **D)** U2OS cells were transfected  
882 with 75 nM of siRNA against USP1. 48 h later cells were treated with C11 1  $\mu$ M and after 12h  
883 samples were processed for quantification of PCNA ubiquitylation by western blot.

884

885 **Figure 4: AKT inhibition impair TLS activation markers and replication fork processivity. A)**

886 Schematic representation of the local UV irradiation method using 5  $\mu$ m micropore filters as UV  
887 shields. **B)** U2OS cells stably transduced with GFP-H-Pol  $\eta$  were pre-treated with the AKT inhibitor  
888 C11 (0.5  $\mu$ M) for 10 h and locally UV-irradiated (100 J/m<sup>2</sup>) in discrete areas of the nuclei as  
889 indicated in A). Immediately after irradiation cells were re-incubated with the AKT inhibitor for 4  
890 h and fixed. IFs were performed to detect cyclobutane pyrimidine dimers (CPDs), which  
891 delimitate the damaged DNA areas. The quantification was performed by counting the CPDs  
892 positive cells that show focal accumulation of GFP-H-Pol  $\eta$ . The results of three independent  
893 experiments are shown, in which at least 200 cells/condition were analyzed. **C)** Schematic  
894 representation of the global UV irradiation method. **D)** U2OS cells stably transduced with GFP-H-  
895 Pol  $\eta$  were UV irradiated (40 J/m<sup>2</sup>) and incubated with C11 (0.5  $\mu$ M). 4 h later, immediately prior  
896 to fixation, cells were treated with PBS 0.1% Triton to wash out the soluble fraction of GFP-H-Pol  
897  $\eta$ . An Image J macro was developed to unbiasedly quantify the remaining GFP-H-Pol  $\eta$  fraction in  
898 each experimental condition. DAPI staining was used to segment the nuclei and at least 1000



899 cells/condition were analyzed. The right panel shows the average of three independent  
900 experiments. **E)** Detailed DNA combing protocol used to evaluate the effect of AKT inhibition on  
901 the processivity of replication forks submitted to UV irradiation. Only bi-color fibers were  
902 measured to ensure that only active replication replication forks were analyzed **F)** DNA bi color  
903 fibers were imaged in each condition using confocal microscopy and were manually measured  
904 using Image J. The total length of 200 DNA fibers/condition are shown on the right panel.  
905 Statistical analysis shown in Figure B, D and F were performed using the T- test (\*\*:  $p \leq 0.01$ ; \*\*\*:  
906  $p \leq 0.001$ ).

907

908 **Figure 5: AKT inhibition triggers replication stress-associated DNA damage and cell death after**  
909 **UV irradiation. A)** U2OS cells were UV irradiated (15 J/m<sup>2</sup>) and 24 h later cells were fixed and  
910  $\gamma$ H2AX immunostaining was performed. An Image J macro was developed to quantify only the  
911 nuclear  $\gamma$ H2AX signal using DAPI for segmentation. Two doses of the AKT inhibitor C11 were used.  
912 The right panel show the average of two independent experiments were at least 100 cells  
913 /condition were analyzed. Statistical analysis was performed using ANOVA with Tukey Kramer  
914 post- test (\*:  $p \leq 0.05$ ). **B)** U2OS cells were UV-irradiated (15 J/m<sup>2</sup>) and treated with C11 (0.5  $\mu$ M).  
915 24 h later cells were processed for cell cycle analysis by flow cytometry using propidium iodide  
916 (PI). Cell cycle analysis was performed using Flowjo Tree Star, Inc. software. The right panel show  
917 the determination of the relative % of each cell cycle phase, including the apoptotic sub-G1  
918 population. **C)** U2OS cells were UV irradiated (15 J/m<sup>2</sup>) and treated with the AKT inhibitor C11  
919 (0.5  $\mu$ M). 24 h later cells were stained using the dead cells stain Sytox red and cells were

920 immediately processed by flow cytometry. The % of live and dead cells was determined for each  
921 condition.

922

923 **Figure 6: AKT inhibition is synthetic lethal with the homologous recombination deficiency**

924 **induced by BRCA1 knockdown. A)** Experimental layout and detailed protocol used to assess

925 synthetic lethality (SL) induction using a co-culture method of HR+ and HR- isogenic HCT116<sup>p21-/-</sup>

926 cell lines, generated by lentiviral transduction of shRNAs against BRCA1. Each cell line co-

927 expresses a different fluorescent protein: shSCR (CFP) and shBRCA1 (iRFP). Equal numbers of

928 both isogenic cells were then plated in triplicates in 96 MW plates and combinations of increasing

929 UV doses with AKT inhibitors were performed. 6 days post treatment the co-cultured population

930 was counted and categorized by the differential expression of fluorescent proteins using

931 automated flow cytometry with an autosampler. The remaining % of each cell population was

932 determined and the ratio of HR-/HR+ cells was calculated. The relative survival of each cell

933 population in comparison to the untreated controls was determined to calculate SL induction by

934 the different treatments. **B)** Positive control to calibrate the robustness of the SL induction assay

935 at 6 days using the PARP inhibitor Olaparib (0.1  $\mu$ M), which is selectively toxic against the HR-

936 population. **C)** Determination of SL induction using HR+ (shSCR) and HR- (shBRCA1) isogenic

937 HCT116<sup>p21-/-</sup> cells in a dose-response UV irradiation curve combined with three AKT inhibitors

938 after 6 days of treatment: C11 (0.1  $\mu$ M), MK-2206 (1  $\mu$ M) and AZD5363 (1  $\mu$ M). Statistical analysis

939 shown in Figure B and C was performed using ANOVA (\*:  $p \leq 0.05$ ; \*\*:  $p \leq 0.01$ ; \*\*\*:  $p \leq 0.001$ ).

940 **D) Clonogenic experiments comparing HCT116<sup>p21-/-</sup> shSCR vs. shBRCA1 cells treated with the**

941 **combination of AKT inhibition (C11 0.1  $\mu$ M) and UV irradiation. Duplicates of each treatment are**

942 displayed. 750 cells were plated in a 96 MW format and after 6 days the survival fraction was  
943 stained with crystal violet. E) Control WBs confirming the efficient impairment of PCNA  
944 ubiquitylation after UV triggered by AKT inhibition for every cell line used to validate the  
945 induction of SL. In the case of mouse and hamster cells (MEF and V-C8), the detection of PCNA  
946 ubiquitylation was performed using the total PCNA antibody (PC-10) because the Ubiquityl-PCNA  
947 antibody (D5C7P) only reacts with human samples. F) Determination of SL induction using HR+  
948 and HR- cells (BRCA1 or BRCA2 deficient) at the optimal UV irradiation dose in combination with  
949 the AKT inhibitor C11 (1 uM). A pair of triple negative breast cancer cell lines (MDA-MB 231-  
950 BRCA1wt vs MDA-MB 436-BRCA1KO), a set of wt MEF (shSCR vs shBRCA1), a hamster BRCA2 KO  
951 cell line with its reconstituted counterpart (VC8 vs VC#13) and a pair of HCT116<sup>p21-/-</sup> cells (shSCR  
952 vs shBRCA2) were used. Statistical analysis shown in panels B, C and F was performed using  
953 ANOVA (\*:  $p \leq 0.05$ ; \*\*:  $p \leq 0.01$ ; \*\*\*:  $p \leq 0.001$ ).

954

955 **Figure 7: Abrogation of PCNA ubiquitylation triggers synthetic lethality in HR-deficient cells**  
956 **submitted to replication stress. A)** HCT116<sup>p21-/-</sup> cells were transduced with 4 different shRNAs  
957 against RAD18 at increasing multiplicities of infection (MOI). 72 h later cells were processed for  
958 western blot to detect RAD18. **B)** HCT116<sup>p21-/-</sup> cells were transduced with the most efficient  
959 RAD18 shRNAs (#1 and #4). After 72 h, cells were UV irradiated (15 J/m<sup>2</sup>) and the induction of  
960 PCNA ubiquitylation was analyzed by western blot 12 h later. **C)** Detailed protocol used to assess  
961 SL induction after RAD18 knockdown. Cells were plated in 6MW plates and transduced with  
962 lentiviral shRNAs #1 or #4. 48 h later cells were re-plated into a 96 MW format. 24 h later cells  
963 were UV irradiated. 6 days post UV irradiation the determination of SL induction using HR+ and

964 HR- cells was performed by calculating the relative survival of the cells transduced with the shRNA  
965 against RAD18 in comparison to the non-transduced cells. Such differential analysis was possible  
966 by gating the transduced population due to the concomitant expression of GFP with the shRNAs.  
967 **D)** HR+ and HR- cells were transduced with shRNA #1 using the protocol detailed in C. The relative  
968 survival of the transduced population was calculated using the non-irradiated population as  
969 control. A dose response UV curve was performed, and samples were processed using 8  
970 experimental replicates. **E) PCNA wt and PCNA K164R mouse embryonic fibroblasts (MEFs) were**  
971 **UV-irradiated (40 J/m<sup>2</sup>). 12 h after UV irradiation samples were processed for WB and ubi-PCNA**  
972 **induction was assessed using a monoclonal antibody that detects mouse PCNA. F) PCNA wt and**  
973 **PCNA K164R MEFs were transduced with shRNAs against murine BRCA1. Each set of cells were**  
974 **UV-irradiated following a dose response curve with or without treatment with the AKT inhibitor**  
975 **C11. After 6 days the relative survival of each cell population was determined using automated**  
976 **flow cytometry. G) HR+ and HR- cell pairs were treated with cisplatin and after 1 h the culture**  
977 **media was replaced. The relative survival of the different HR- vs HR+ pairs was assessed 6 days**  
978 **later H) PCNA wt and PCNA K164R MEFs were treated with cisplatin and after 1 h the culture**  
979 **media was replaced. The relative survival of the different HR- vs HR+ pairs was assessed 6 days**  
980 **later. Statistical analysis shown in panels D, F, G and H was performed using ANOVA (\*: p ≤ 0.05;**  
981 **\*\* : p ≤ 0.01; \*\*\*: p ≤ 0.001).**

982

983 **Supplementary Figure 1: Single antibody vs dual antibody detection of total and ubi-PCNA.**

984 **A)** U2OS cells were grown in a 24 MW format. 100K cells were seeded per 24 well. 24 h later cells  
985 were UV-irradiated (40 J/m<sup>2</sup>) and 4 or 8 h post UV cells were processed for WB. Sample lysis was

986 performed with Laemmli-buffer, collected in 1.5 ml tubes and boiled for 15 minutes. The total  
987 sample volume for each treatment was loaded in a WB and PCNA and ubi-PCNA detection was  
988 performed using a monoclonal antibody against PCNA (clone PC10). **B)** U2OS cells were grown in  
989 a 96 MW format. 30K cells were seeded per 96 well. 24 h later samples were UV irradiated (40  
990 J/m<sup>2</sup>) and 4 h post UV samples were processed for WB. Sample lysis was performed in the same  
991 MW plate using benzonase (250U/mL). Loading of WB gels was performed directly from the 96  
992 MW plate without boiling. The total sample volume from each well was loaded and the detection  
993 of PCNA and ubi-PCNA was performed by the simultaneous incubation with two monoclonal  
994 antibodies from cell signaling (mouse  $\alpha$  PCNA, clone PC10, and rabbit  $\alpha$  ubi-PCNA clone D5C7P).

995

996 **Supplementary Figure 2: Identification and validation of the AKT inhibitors GSK1581428A and**

997 **GSK1389063A. A)** Screening results of the 96 MW plate containing compounds GSK1581428A

998 and GSK1389063A, which were named C11 and G8 respectively, due to their positions in the

999 plate. The quantification was performed using the software of the LICOR Odyssey infrared

1000 scanner and the inhibitory capacity of the compounds was calculated by comparing to the

1001 normalized values of the 8 non-treated (UV-irradiated) of the plate. **B)** U2OS cells were UV

1002 irradiated (15 J/m<sup>2</sup>) and treated with increasing doses of compound C11, from 0.1  $\mu$ M to 1  $\mu$ M.

1003 12 h later, the inhibition of PCNA ubiquitylation and AKT activation were analyzed by western

1004 blot.

1005

1006 **Supplementary Figure 3: Tools to validate TLS impairment after AKT inhibition. A)** U2OS cells

1007 were either transiently transfected or stably transduced with GFP-H- Pol  $\eta$  using lentiviral vectors.

1008 A low magnification image (20 X) using a fluorescence microscope was taken to show the  
1009 homogeneity and levels of GFP-H- Pol  $\eta$  in each case. The transient expression was evaluated  
1010 after 48 h and the stable expression was evaluated two weeks after lentiviral transduction and  
1011 puromycin selection. **B)** DAPI images corresponding to Figure 4A, which were used to segment  
1012 the nuclei prior to  $\gamma$ H2AX quantification.

1013

1014 **Supplementary Figure 4: Induced HR deficiencies in the isogenic cell lines generated to evaluate**  
1015 **the impact of impaired PCNA ubiquitylation. A)** Western blot showing the efficiency of BRCA1  
1016 knockdown using a lentiviral shRNA approach. The pair of isogenic HCT116<sup>p21-/-</sup> cells obtained  
1017 (shSCR and shBRCA1) were used in all the experiments shown in Figures 6 and 7. **B)** HR deficiency  
1018 triggered by the same shRNA used in A) tested with the DR-GFP method. The right panel shows  
1019 the normalized quantification of HR efficiency in shSCR vs shBRCA1 cells. **C) SL induction**  
1020 **experiments showing the complete UV dose response curve of the experiment shown in Figure**  
1021 **6E. D) Results of the survival experiment using the RAD18 shRNA #4, performed in parallel with**  
1022 **shRNA #1 (shown in Figure 7D). Statistical analysis shown in panels C and D was performed using**  
1023 **ANOVA (\*:  $p \leq 0.05$ ; \*\*:  $p \leq 0.01$ ; \*\*\*:  $p \leq 0.001$ ).**
